# Supplementary material
Source: publisher figshare collection journal article supplement (https://gsajournals.figshare.com/ndownloader/files/22772879)
Supplement: Supplementary file 1 [file 22772879]

## Sheet: Table S4 Legend
Table S4: Analysis of Aves COI barcodes obtained from BOLD. The query "Aves" was made using the BOLD server (Ratnasingham and Hebert 2007) to recover COI FASTA sequences. MAFFT alignment was carried out under the "auto" setting and translated in AliView (Larsson 2014) using the vertebrate mtDNA translation table. Informative COI samples outside of the order Apodiformes and not harboring alanine a…

## Sheet: Aves BOLD Non-A153 Non-Hummingb
BOLD Sample	Position 153	Genus *	Prevelance in genus
TZBNA290-03|Aegolius funereus|COI-5P|AY666508	G	Aegolius	1/27 annotated Aegolius in BOLD System is G
GBMIN134217-17|Bostrychia hagedash|COI-5P|KX012909	G	Bostrychia	1/4 annotated Bostrychia in BOLD System is G
GBIR0179-06|Campethera cailliautii|COI-5P|AY944307	G	Campethera	1/7 annotated Campethera in BOLD System is G
GBIR0147-06|Celeus elegans|COI-5P|AY940774	G	Celeus	1/33 annotated Celeus in BOLD System is G
BROMB691-07|Eudromia formosa|COI-5P|JN801655	G	Eudromia	1/11 annotated Eurdromia in BOLD System is G
GBIR664-08|Dendrocincla anabatina|COI-5P|EU442298	S	Dendrocincla	1/68 annotated Dendrocincla in BOLD System is S
GBIR3293-13|Oenanthe lugens halophila|COI-5P|HM046859	T	Oenanthe	1/141 annotated Oenanthe in BOLD System is T
CDAMH075-05|Phalaenoptilus nuttallii|COI-5P|DQ433081	T	Phalaenoptilus	1/7 annotated Phalaenoptilus in BOLD System is T
GBIR4983-13|Zenaida aurita|COI-5P|JN639026	V	Zenaida	1/50 annotated Zenaida in BOLD System is V
LBARG054-10|Passeriformes|COI-5P|HM396044-SUPPRESSED	T	Myiarchus	0/98 annotated Myiarchus in BOLD System is T
PTYRN023-12|Passeriformes|COI-5P	T	Empidonax	0/58 annotated Empidonax in BOLD System is T
PTYRN022-12|Passeriformes|COI-5P	T	Empidonax	0/58 annotated Empidonax in BOLD System is T
PTYRN021-12|Passeriformes|COI-5P	T	Empidonax	0/58 annotated Empidonax in BOLD System is T
KBOL193-10|Passeriformes|COI-5P	T	Lepidothrix	0/21 annotated Lepidothrix in BOLD System is T
BRIND001-16|Sturninae|COI-5P	V	Acridotheres	0/76 annotated Acridotheres in BOLD System is V
*If sample is not annotated with species name, genus was determined by closest BLASTN hit of the associated FASTA sequence.

## Sheet: Aves BOLD Non-V83 Non-Hummingb
BOLD Sample	Position 83	Genus *	Prevelance in genus
USNMA051-10|Crypturellus soui|COI-5P|JQ174584	A	Crypturellus	1/22 annotated Crypturellus in BOLD System is A
GBIR2617-12|Poicephalus gulielmi|COI-3P|AY301470	A	Poicephalus	2/35 annotated Poicephalus in BOLD System are A
GBIR2725-12|Poicephalus robustus|COI-3P|EU621648	A	Poicephalus	2/35 annotated Poicephalus in BOLD System are A
GBIR2618-12|Psittacus erithacus|COI-3P|AY301471	A	Psittacus	2/9 annotated Psittacus in BOLD System are A
GBIR2734-12|Psittacus erithacus|COI-3P|EU621657	A	Psittacus	2/9 annotated Psittacus in BOLD System are A
USNMA460-10|Trogon clathratus|COI-5P|JQ176536	A	Trogon	1/61 annotated Trogon in BOLD System is A
GBIR0133-06|Veniliornis cassini|COI-5P|AY927190	A	Veniliornis	1/55 annotated Veniliornis in BOLD System is A
GBIR0190-06|Eudyptes robustus|COI-5P|DQ137176	G	Eudyptes	1/72 annotated Eudyptes in BOLD System is G
GBIR1493-09|Pseudopodoces humilis|COI-5P|EU382169	G	Pseudopodoces	1/21 annotated Pseudopodoces in BOLD System is G
GBIR5151-13|Accipiter tachiro|COI-5P|JF792338	I	Accipiter	19/237 annotated Accipiter in BOLD System are I
GBIR5214-13|Accipiter tachiro|COI-5P|JF312142	I	Accipiter	19/237 annotated Accipiter in BOLD System are I
GBIR5187-13|Accipiter tachiro pembaensis|COI-5P|JF312180	I	Accipiter	19/237 annotated Accipiter in BOLD System are I
GBIR5153-13|Accipiter tachiro sparsimfasciatus|COI-5P|JF312214	I	Accipiter	19/237 annotated Accipiter in BOLD System are I
GBIR5157-13|Accipiter tachiro sparsimfasciatus|COI-5P|JF312210	I	Accipiter	19/237 annotated Accipiter in BOLD System are I
GBIR5158-13|Accipiter tachiro sparsimfasciatus|COI-5P|JF312209	I	Accipiter	19/237 annotated Accipiter in BOLD System are I
GBIR5159-13|Accipiter tachiro sparsimfasciatus|COI-5P|JF312208	I	Accipiter	19/237 annotated Accipiter in BOLD System are I
GBIR5161-13|Accipiter tachiro sparsimfasciatus|COI-5P|JF312206	I	Accipiter	19/237 annotated Accipiter in BOLD System are I
GBIR5162-13|Accipiter tachiro sparsimfasciatus|COI-5P|JF312205	I	Accipiter	19/237 annotated Accipiter in BOLD System are I
GBIR5163-13|Accipiter tachiro sparsimfasciatus|COI-5P|JF312204	I	Accipiter	19/237 annotated Accipiter in BOLD System are I
GBIR5164-13|Accipiter tachiro sparsimfasciatus|COI-5P|JF312203	I	Accipiter	19/237 annotated Accipiter in BOLD System are I
GBIR5165-13|Accipiter tachiro sparsimfasciatus|COI-5P|JF312202	I	Accipiter	19/237 annotated Accipiter in BOLD System are I
GBIR5166-13|Accipiter tachiro sparsimfasciatus|COI-5P|JF312201	I	Accipiter	19/237 annotated Accipiter in BOLD System are I
GBIR5167-13|Accipiter tachiro sparsimfasciatus|COI-5P|JF312200	I	Accipiter	19/237 annotated Accipiter in BOLD System are I
GBIR5168-13|Accipiter tachiro sparsimfasciatus|COI-5P|JF312199	I	Accipiter	19/237 annotated Accipiter in BOLD System are I
GBIR5169-13|Accipiter tachiro sparsimfasciatus|COI-5P|JF312198	I	Accipiter	19/237 annotated Accipiter in BOLD System are I
GBIR5170-13|Accipiter tachiro sparsimfasciatus|COI-5P|JF312197	I	Accipiter	19/237 annotated Accipiter in BOLD System are I
GBIR5174-13|Accipiter tachiro sparsimfasciatus|COI-5P|JF312193	I	Accipiter	19/237 annotated Accipiter in BOLD System are I
GBIR5208-13|Accipiter tachiro sparsimfasciatus|COI-5P|JF312156	I	Accipiter	19/237 annotated Accipiter in BOLD System are I
IAVHB238-14|Amazona amazonica|COI-5P	I	Amazona	1/101 annotated Amazona in BOLD System is I
KBARG286-07|Anairetes parulus|COI-5P|FJ027080	I	Anairetes	1/7 annotated Anairetes in BOLD System is I
TZBNA202-03|Anas rubripes|COI-5P|AY666221	I	Anas	1/403 annotated Anas in BOLD System is I
BROM388-06|Brachyramphus brevirostris|COI-5P|EU525326	I	Brachyramphus	1/34 annotated Brachyramphus in BOLD System is I
IAVHB284-14|Brotogeris versicolurus|COI-5P	I	Brotogeris	1/27 annotated Brotogeris in BOLD System is I
GBMNA18915-19|Bubo blakistoni|COI-5P|LC099105	I	Bubo	2/51 annotated Bubo in BOLD System are I
GBMNA18916-19|Bubo blakistoni|COI-5P|LC099106	I	Bubo	2/51 annotated Bubo in BOLD System are I
GBIR3170-12|Calidris melanotos|COI-5P|JQ251241	I	Calidris	2/342 annotated Calidris in BOLD System are I
GBIR3176-12|Calidris melanotos|COI-5P|JQ251247	I	Calidris	2/342 annotated Calidris in BOLD System are I
KBAR493-06|Chordeiles nacunda|COI-5P|FJ028122	I	Chordeiles	5/18 annotated Chordeiles in BOLD System are I
KBAR494-06|Chordeiles nacunda|COI-5P|FJ028123	I	Chordeiles	5/18 annotated Chordeiles in BOLD System are I
KBAR838-06|Chordeiles nacunda|COI-5P|FJ028124	I	Chordeiles	5/18 annotated Chordeiles in BOLD System are I
USNMJ276-11|Chordeiles nacunda|COI-5P|JQ175916	I	Chordeiles	5/18 annotated Chordeiles in BOLD System are I
USNMK275-11|Chordeiles nacunda|COI-5P|JQ175915	I	Chordeiles	5/18 annotated Chordeiles in BOLD System are I
BSPBA002-07|Gampsonyx swainsonii|COI-5P	I	Gampsonyx	8/8 annotated Gampsonyx in BOLD System are I
BSPBA005-07|Gampsonyx swainsonii|COI-5P	I	Gampsonyx	8/8 annotated Gampsonyx in BOLD System are I
IAVHB082-13|Gampsonyx swainsonii|COI-5P	I	Gampsonyx	8/8 annotated Gampsonyx in BOLD System are I
KBAR776-06|Gampsonyx swainsonii|COI-5P|FJ027613	I	Gampsonyx	8/8 annotated Gampsonyx in BOLD System are I
LGEMA021-07|Gampsonyx swainsonii|COI-5P|JN801680	I	Gampsonyx	8/8 annotated Gampsonyx in BOLD System are I
LGEMA404-08|Gampsonyx swainsonii|COI-5P|JN801679	I	Gampsonyx	8/8 annotated Gampsonyx in BOLD System are I
USNMI208-11|Gampsonyx swainsonii|COI-5P|JQ174910	I	Gampsonyx	8/8 annotated Gampsonyx in BOLD System are I
USNMK306-11|Gampsonyx swainsonii|COI-5P|JQ174911	I	Gampsonyx	8/8 annotated Gampsonyx in BOLD System are I
BSPBA338-07|Glaucidium jardinii|COI-5P	I	Glaucidium	1/29 annotated Glaucidium in BOLD System is I
MNCN767-09|Glyphorynchus spirurus|COI-5P|JX487473	I	Glyphorynchus	1/70 annotated Glyphorynchus in BOLD System is I
BSPAC006-13|Leptodon cayanensis|COI-5P	I	Leptodon	3/3 annotated Leptodon in BOLD System are I
KPARG465-08|Leptodon cayanensis|COI-5P	I	Leptodon	3/3 annotated Leptodon in BOLD System are I
SIELS168-13|Leptodon cayanensis|COI-5P|KM894335	I	Leptodon	3/3 annotated Leptodon in BOLD System are I
BROM250-06|Limnodromus semipalmatus|COI-5P	I	Limnodromus	2/23 annotated Limnodromus in BOLD System are I
BROM251-06|Limnodromus semipalmatus|COI-5P|KF009539	I	Limnodromus	2/23 annotated Limnodromus in BOLD System are I
USNME135-11|Lyncornis macrotis|COI-5P|JQ174827	I	Lyncornis	2/2 annotated Lyncornis in BOLD System are I
USNME136-11|Lyncornis macrotis|COI-5P|JQ174828	I	Lyncornis	2/2 annotated Lyncornis in BOLD System are I
USNMA551-10|Megascops clarkii|COI-5P|JQ175331	I	Megascops	1/50 annotated Megascops in BOLD System is I
BBB564-13|Mergus octosetaceus|COI-5P|KM896444	I	Mergus	1/31 annotated Mergus in BOLD System is I
USNME086-11|Microhierax caerulescens|COI-5P|JQ175370	I	Microhierax	1/3 annotated Microhierax in BOLD System is I
KAARG194-07|Pardirallus sanguinolentus|COI-5P|FJ027940	I	Pardirallus	3/5 annotated Pardirallus in BOLD System are I
USNMJ044-11|Pardirallus sanguinolentus|COI-5P|JQ175676	I	Pardirallus	3/5 annotated Pardirallus in BOLD System are I
USNMJ046-11|Pardirallus sanguinolentus|COI-5P|JQ175675	I	Pardirallus	3/5 annotated Pardirallus in BOLD System are I
BBB818-13|Phyllomyias virescens|COI-5P|KM896514	I	Phyllomyias	1/12 annotated Phyllomyias in BOLD System is I
BBB324-13|Pionopsitta pileata|COI-5P|KM896519	I	Pionopsitta	2/2 annotated Pionopsitta in BOLD System are I
BBB325-13|Pionopsitta pileata|COI-5P|KM896520	I	Pionopsitta	2/2 annotated Pionopsitta in BOLD System are I
MNCN678-08|Pithys albifrons|COI-5P|JX487799	I	Pithys	1/49 annotated Pithys in BOLD System is I
KKBNA411-05|Sitta pygmaea|COI-5P|DQ434094	I	Sitta	1/104 annotated Sitta in BOLD System is I
GBIR4791-13|Spheniscus magellanicus|COI-5P|FJ407118	I	Spheniscus	1/114 annotated Spheniscus in BOLD System is I
KPARG466-08|Spizaetus melanoleucus|COI-5P	I	Spizaetus	2/8 annotated Spizaetus in BOLD System are I
USNMI203-11|Spizaetus melanoleucus|COI-5P|JQ176244	I	Spizaetus	2/8 annotated Spizaetus in BOLD System are I
BROM014-06|Sterna striata|COI-5P	I	Sterna	6/61 annotated Sterna in BOLD System are I
BROM082-06|Sterna striata|COI-5P	I	Sterna	6/61 annotated Sterna in BOLD System are I
NZCOI388-09|Sterna striata|COI-5P|MK262418	I	Sterna	6/61 annotated Sterna in BOLD System are I
NZCOI654-09|Sterna striata|COI-5P|MK262505	I	Sterna	6/61 annotated Sterna in BOLD System are I
BROM086-06|Sterna vittata|COI-5P	I	Sterna	6/61 annotated Sterna in BOLD System are I
BROM087-06|Sterna vittata|COI-5P	I	Sterna	6/61 annotated Sterna in BOLD System are I
GBMIN134869-17|Streptopelia decaocto|COI-5P|MF381999	I	Streptopelia	1/121 annotated Streptopelia in BOLD System is I
GBIR597-07|Thalassornis leuconotus|COI-5P|U97738	I	Thalassornis	1/1 annotated Thalassornis in BOLD System is I
GBMIN134655-17|Upupa epops|COI-5P|KY689861	I	Upupa	1/41 annotated Upupa in BOLD System is I
GBIR4860-13|Fregata magnificens|COI-5P|AY369052	L	Fregata	19/19 annotated Fregata in BOLD System are L
KKBNA196-05|Fregata magnificens|COI-5P|DQ433646	L	Fregata	19/19 annotated Fregata in BOLD System are L
KKBNA379-05|Fregata magnificens|COI-5P|DQ433645	L	Fregata	19/19 annotated Fregata in BOLD System are L
USNMC099-10|Fregata magnificens|COI-5P|JQ174868	L	Fregata	19/19 annotated Fregata in BOLD System are L
GBIR4621-13|Fregata minor|COI-5P|JX569158	L	Fregata	19/19 annotated Fregata in BOLD System are L
GBIR4622-13|Fregata minor|COI-5P|JX569157	L	Fregata	19/19 annotated Fregata in BOLD System are L
GBIR4623-13|Fregata minor|COI-5P|JX569156	L	Fregata	19/19 annotated Fregata in BOLD System are L
GBIR4624-13|Fregata minor|COI-5P|JX569155	L	Fregata	19/19 annotated Fregata in BOLD System are L
GBIR4625-13|Fregata minor|COI-5P|JX569154	L	Fregata	19/19 annotated Fregata in BOLD System are L
GBIR4626-13|Fregata minor|COI-5P|JX569153	L	Fregata	19/19 annotated Fregata in BOLD System are L
GBIR4627-13|Fregata minor|COI-5P|JX569152	L	Fregata	19/19 annotated Fregata in BOLD System are L
GBIR4628-13|Fregata minor|COI-5P|JX569151	L	Fregata	19/19 annotated Fregata in BOLD System are L
GBIR4629-13|Fregata minor|COI-5P|JX569150	L	Fregata	19/19 annotated Fregata in BOLD System are L
NZCOI556-09|Fregata minor|COI-5P	L	Fregata	19/19 annotated Fregata in BOLD System are L
SIBHI015-11|Fregata minor|COI-5P|JF498856	L	Fregata	19/19 annotated Fregata in BOLD System are L
USNMD141-11|Fregata minor|COI-5P|JQ174869	L	Fregata	19/19 annotated Fregata in BOLD System are L
USNML155-11|Fregata minor|COI-5P|JQ174870	L	Fregata	19/19 annotated Fregata in BOLD System are L
USNML156-11|Fregata minor|COI-5P|JQ174871	L	Fregata	19/19 annotated Fregata in BOLD System are L
GBIR0091-06|Fregata sp. 2815okinawa|COI-5P|AP009192	L	Fregata	19/19 annotated Fregata in BOLD System are L
CSBPC428-11|Accipitriformes|COI-5P	I	Gampsonyx	8/8 annotated Gampsonyx in BOLD System are I
CORB212-10|Passeriformes|COI-5P	I	Hypocnemis	0/12 annotated Hypocnemis in BOLD System is I
KBOL333-12|Passeriformes|COI-5P	I	Hypocnemoides	0/4 annotated Hypocnemoides in BOLD System is I
CSBPA429-11|Passeriformes|COI-5P	I	Ochthoeca	0/9 annotated Ochthoeca in BOLD System is I
CSBPA430-11|Passeriformes|COI-5P	I	Ochthoeca	0/9 annotated Ochthoeca in BOLD System is I
CSBPA605-11|Passeriformes|COI-5P	I	Ochthoeca	0/9 annotated Ochthoeca in BOLD System is I
CSBPA606-11|Passeriformes|COI-5P	I	Ochthoeca	0/9 annotated Ochthoeca in BOLD System is I
CSBPA607-11|Passeriformes|COI-5P	I	Ochthoeca	0/9 annotated Ochthoeca in BOLD System is I
CSBPC376-11|Gruiformes|COI-5P	I	Pardirallus	3/5 annotated Pardirallus in BOLD System are I
CSBPC402-11|Gruiformes|COI-5P	I	Pardirallus	3/5 annotated Pardirallus in BOLD System are I
LBARG364-10|Caprimulgiformes|COI-5P|HM396276-SUPPRESSED	I	Podager	0/0 annotated Podager in BOLD System is I
LBARG370-10|Caprimulgiformes|COI-5P|HM396280-SUPPRESSED	I	Podager	0/0 annotated Podager in BOLD System is I
LBARG081-10|Accipitriformes|COI-5P|HM396060-SUPPRESSED	I	Spizastur	2/8 annotated Spizaetus (Spizastur) in BOLD System are I
LBARG082-10|Accipitriformes|COI-5P|HM396061-SUPPRESSED	I	Spizastur	2/8 annotated Spizaetus (Spizastur) in BOLD System are I
BOM2047-11|Passeriformes|COI-5P	I	Tyrannus	0/49 annotated Tyrannus in BOLD System is I
BOM2048-11|Passeriformes|COI-5P	I	Tyrannus	0/49 annotated Tyrannus in BOLD System is I
CSBPC093-11|Suliformes|COI-5P	L	Fregata	19/19 annotated Fregata in BOLD System is L
CSBPA203-11|Passeriformes|COI-5P	L	Tyrannus	0/49 annotated Tyrannus in BOLD System is L
*If sample is not annotated with species name, genus was determined by closest BLASTN hit of the associated FASTA sequence.
